# Supplementary material for: Daily Life Restrictions are Common and Associated with Health Concerns and Dietary Challenges in Adult Celiac Disease Patients Diagnosed in Childhood
Source: MDPI journal article supplement (doi:10.3390/nu11081718), 2019-07-25
Supplement: s1 [file s1]

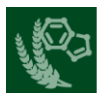

**Supplementary table.** Presence of co-morbidities in 231 currently adult patients diagnosed with celiac disease in childhood with and without daily life restrictions caused by a gluten-free diet (GFD).

|                                             | Restrictions due to GFD |                | <i>p</i> -value |
|---------------------------------------------|-------------------------|----------------|-----------------|
|                                             | Yes, n=107<br>%         | No, n=124<br>% |                 |
| Celiac disease-associated diseases          |                         |                |                 |
| <i>Thyroid disease</i>                      | 10                      | 11             | 0.831           |
| <i>Type 1 diabetes</i>                      | 10                      | 8              | 0.694           |
| Other conditions                            |                         |                |                 |
| <i>Allergy<sup>1</sup></i>                  | 44                      | 40             | 0.591           |
| <i>Osteoporosis or fractures</i>            | 27                      | 24             | 0.613           |
| <i>Skin disease</i>                         | 18                      | 14             | 0.458           |
| <i>Depression</i>                           | 14                      | 12             | 0.651           |
| <i>Asthma</i>                               | 10                      | 13             | 0.470           |
| <i>Miscarriages<sup>2</sup></i>             | 7                       | 11             | 0.369           |
| <i>Other intestinal disease<sup>3</sup></i> | 5                       | 8              | 0.325           |
| <i>Hypertension</i>                         | 6                       | 4              | 0.540           |
| <i>Rheumatic disease</i>                    | 6                       | 3              | 0.307           |
| <i>Eating disorder</i>                      | 5                       | 3              | 0.746           |
| <i>Cancer<sup>4</sup></i>                   | 2                       | 2              | 1.000           |

<sup>1</sup>E.g., allergies to animals, food, pollen, and medicine; <sup>2</sup>only in women; <sup>3</sup>E.g., Crohn's disease, ulcerative colitis, and gastric ulcer; <sup>4</sup>E.g., Hodgkin's lymphoma, non-Hodgkin's lymphoma, breast cancer, and brain cancer.
